# Supplementary material
Source: PubMed Central journal article supplement (PMC9174047)
Supplement: mmc1.pdf [file mmc1.pdf]

## SUPPLEMENTARY MATERIALS:

### Contents

|                                                                                                                |   |
|----------------------------------------------------------------------------------------------------------------|---|
| <b>Supplementary Methods</b> .....                                                                             | 1 |
| <b>Figure S1. Flow diagram of study cohort</b> .....                                                           | 3 |
| <b>Table S1. Clinical characteristics associated with Omicron infection in haemodialysis patients</b> .....    | 4 |
| <b>Table S2. Clinical characteristics of patients receiving BNT1262b2 compared with ChAdOx1</b> .....          | 5 |
| <b>Table S3. Clinical characteristics associated with Omicron infection</b> .....                              | 6 |
| <b>Table S4. Risk of SARS-CoV-2 infection by vaccination status and prior infection</b> .....                  | 7 |
| <b>Table S5. Treatments received by care setting</b> .....                                                     | 8 |
| <b>Table S6. Vaccine effectiveness against hospitalisation by vaccination status and prior infection</b> ..... | 8 |
| <b>Supplementary References</b> .....                                                                          | 9 |

### Supplementary Methods

#### *Patient Selection*

One-thousand, one-hundred and twenty-one patients who were receiving haemodialysis within Imperial College Renal and Transplant Centre on the 1st December 2021, and were being prospectively studied as part of ‘The Impact of COVID-19 on Patients with Renal disease and Immunosuppressed Patients’ study were included. The study was approved by the Health Research Authority, Research Ethics Committee (Reference: 20/WA/0123). All, infection events were captured until 16<sup>th</sup> January 2022, with clinical follow up until 23<sup>rd</sup> January 2022. Clinical and vaccine data were obtained from electronic patient records and the institutional vaccine database, respectively.

Primary vaccine doses (2-doses for the purpose of this analysis), were either BNT162b2 or ChAdOx1, whilst all 3<sup>rd</sup> doses were of a mRNA based vaccine (BNT162b2), as per UK policy. The median time from 3<sup>rd</sup> vaccine to end of follow up was 91 (71-101) days compared with 286 (272-292) days from 2<sup>nd</sup> vaccine in those who only received 2-doses. Within the group who received 3 doses, the median time to infection post 3<sup>rd</sup> dose was 75 (53-93) days. There was no difference in follow up time between those who had infection post 3<sup>rd</sup> dose, 91 (67-106) days, compared with those without infection, 91 (71-100) days,  $p=0.36$ .

### *Detection of SARS-CoV-2 infection*

All patients underwent weekly screening for asymptomatic infection by nasopharyngeal swabbing, with viral detection via reverse-transcriptase polymerase chain reaction (RT-PCR) assays. In addition, patients underwent additional screening for infection if symptomatic. The variant of interest, Omicron (B.1.1.529), was either detected by sequencing or latterly via the demonstration of S-gene drop out; infection was deemed of 'probable Omicron infection' if these criteria were not met, but overall percentage of sequenced cases within London was >96%. Reverse-transcriptase PCR was carried out using either the ThermoFisher, Cepheid or Roche assays. Patients admitted to hospital for non-COVID related causes were screened twice a week for infection. Nosocomial transmission was defined as newly detected infection following a negative admission swab, in a patient who had contact (shared nursing bay), with a positive patient. If no positive contact, nosocomial infection would require an admission >7 days and 2 prior negative swabs.

### *SARS-CoV-2 antibody detection*

Routine serological screening of haemodialysis patients every 3-months started in June 2020, as previously described<sup>S1</sup>. Serum was tested for antibodies to both the nucleocapsid protein (anti-NP) and spike protein (anti-S). Anti-NP was tested using the Abbott Architect SARS-CoV-2 IgG 2 step chemiluminescent immunoassay (CMIA) according to manufacturer's instructions. This is a non-quantitative assay and samples were interpreted as positive or negative with a threshold index value of 1.4. The presence of anti-NP was used as a marker of natural infection. For vaccine responses, anti-S IgG were assessed using the Abbott Architect SARS-CoV-2 IgG Quant II CMIA. Anti-S antibody titres are quantitative with a threshold value of 7.1 BAU/ml for positivity, and an upper level of detection of 5680 BAU/ml. Prior to December 2020, patients were initially screened for anti-NP, and those with a subthreshold anti-NP index value (0.25-1.4), underwent confirmatory testing for natural infection by assessing for receptor binding domain (anti-RBD) antibodies. This was performed using an in-house double binding antigen ELISA (Imperial Hybrid DABA; Imperial College London, London, UK), which detects total RBD antibodies

### *Definition of prior SARS-CoV-2 infection*

Prior exposure was defined by a history of infection confirmed through viral detection from nasopharyngeal swab specimens, via reverse-transcriptase polymerase chain reaction (RT-PCR) assays, or by serological assessment.

### **Statistical Analysis**

Statistical analysis was conducted using Prism 9.0 (GraphPad Software Inc., San Diego, California). Unless otherwise stated, all data are reported as median with interquartile range (IQR). The Chi-squared test was used for proportional assessments. The Mann-Whitney and Kruskal-Wallis tests were used to assess the difference between 2 or >2 groups, with Dunn's post-hoc test to compare individual groups.

### **Assessment of vaccine effectiveness**

Reported outcomes included RT-PCR proven SARS-CoV-2 infection, hospitalisation, and death; death was recorded as SARS-CoV2 related if it occurred within 28 days of confirmed infection. Patients who died of non-SARS-CoV2 related causes, and those who received a transplant during follow up, were censored at the time of death or transplant respectively. Event rate for infection were reported as incidence per 1000-patient days at risk. Cox proportional hazards models were used to determine adjusted hazard ratios (HR) for the first PCR-positive test post 14 days after last vaccine. Patients were categorised by vaccination status on the 1<sup>st</sup> December, as unvaccinated, partially vaccinated (2 vaccines) or boosted (3 vaccines). Patients who received additional doses of a SAR-CoV-2 vaccine during the follow up period were censored at 14-days post inoculation. Only 6 patients received a 4th vaccine dose during the study period. Vaccine effectiveness (VE) was calculated using the formula  $VE = (1 - \text{adjusted HR}) \times 100$ .

**Figure S1. Flow diagram of study cohort.**

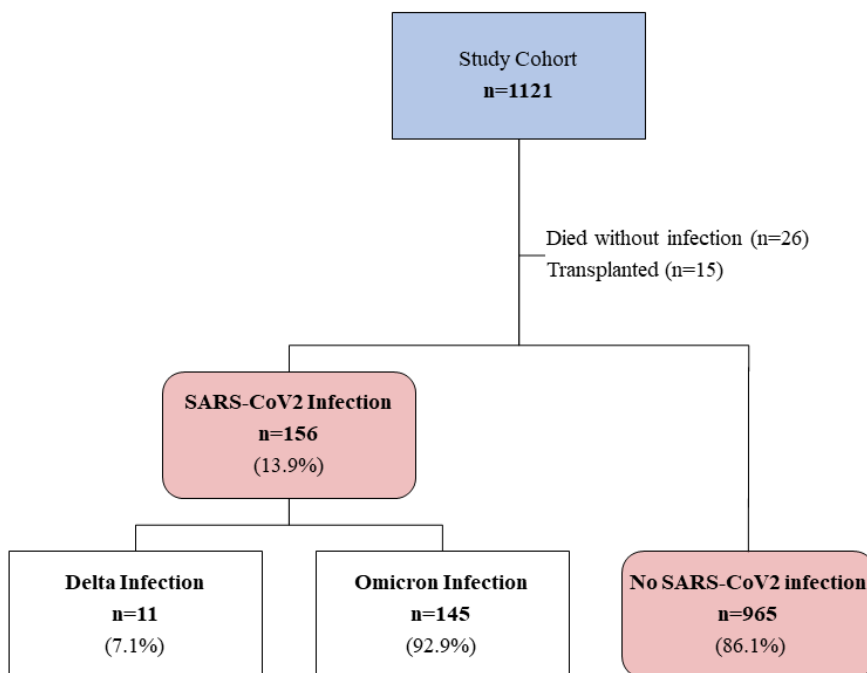

**Table S1. Clinical characteristics associated with Omicron infection in haemodialysis patients.**

| Characteristics                             |                           | Infection Free<br>N=965 (%) | Omicron Infection<br>N= 145 (%) | p value       |
|---------------------------------------------|---------------------------|-----------------------------|---------------------------------|---------------|
| <b>Gender</b>                               | Male                      | 595 (61.7)                  | 84 (57.9)                       | 0.39          |
|                                             | Female                    | 370 (38.3)                  | 61 (42.1)                       |               |
| <b>Age</b>                                  | Years (Median)            | 66 (56-76)                  | 61 (49-74)                      | <b>0.0035</b> |
| <b>Ethnicity</b>                            | Caucasian                 | 285 (29.5)                  | 32 (22.1)                       | <b>0.0007</b> |
|                                             | Black*                    | 220 (22.8)                  | 52 (35.9)                       |               |
|                                             | Indoasian                 | 340 (35.2)                  | 41 (28.3)                       |               |
|                                             | Other                     | 120 (12.4)                  | 20 (13.8)                       |               |
| <b>Cause of Kidney Failure</b>              | Polycystic kidney disease | 47 (4.9)                    | 4 (2.8)                         | 0.25          |
|                                             | Glomerulonephritis*       | 170 (17.6)                  | 20 (13.8)                       |               |
|                                             | Diabetic nephropathy      | 399 (41.3)                  | 65 (44.8)                       |               |
|                                             | Urological                | 70 (7.3)                    | 6 (4.1)                         |               |
|                                             | Unknown                   | 187 (19.4)                  | 39 (26.9)                       |               |
|                                             | Other                     | 92 (9.5)                    | 11 (7.6)                        |               |
| <b>Previous transplant</b>                  | Yes                       | 190 (19.7)                  | 24 (16.6)                       | 0.37          |
|                                             | No                        | 775 (80.3)                  | 121 (83.4)                      |               |
| <b>Immunosuppression at time of vaccine</b> | None                      | 806 (83.5)                  | 123 (84.8)                      | 0.69          |
|                                             | Yes                       | 159 (16.5)                  | 22 (15.2)                       |               |
| <b>Diabetes</b>                             | No                        | 457 (47.4)                  | 71 (49.0)                       | 0.72          |
|                                             | Yes                       | 508 (52.6)                  | 74 (51.0)                       |               |
| <b>Prior SARS-CoV2 infection</b>            | No                        | 449 (46.5)                  | 82 (56.6)                       | <b>0.024</b>  |
|                                             | Yes                       | 516 (53.5)                  | 63 (43.4)                       |               |
| <b>Vaccination status</b>                   | Unvaccinated              | 55 (5.7)                    | 15 (10.3)                       | <b>0.0002</b> |
|                                             | Partially vaccinated      | 239 (24.8)                  | 54 (37.2)                       |               |
|                                             | Boosted                   | 671 (69.5)                  | 76 (52.4)                       |               |
| <b>Vaccine type (2-doses)^</b>              | BNT1262b2                 | 495 (54.4)                  | 56 (43.1)                       | <b>0.0156</b> |
|                                             | ChAdOx1                   | 415 (45.6)                  | 74 (56.9)                       |               |

\*Comparator. ^Vaccinated patients only

**Table S2. Clinical characteristics of patients receiving BNT1262b2 compared with ChAdOx1**

| Characteristics                             |                           | ChAdOx1<br>N=489 (%) | BNT1262b2<br>N=551 (%) | P value     |
|---------------------------------------------|---------------------------|----------------------|------------------------|-------------|
| <b>Gender</b>                               | Male                      | 296 (60.5)           | 349 (63.3)             | 0.35        |
|                                             | Female                    | 193 (39.5)           | 202 (36.7)             |             |
| <b>Age</b>                                  | Years (Median)            | 65 (55-74)           | 66 (56-92)             | 0.10        |
| <b>Ethnicity</b>                            | Caucasian                 | 144 (29.4)           | 158 (28.7)             | <b>0.04</b> |
|                                             | Black*                    | 124 (25.4)           | 110 (20.0)             |             |
|                                             | Indoasian                 | 163 (33.3)           | 207 (37.6)             |             |
|                                             | Other                     | 58 (11.9)            | 76 (13.8)              |             |
| <b>Cause of Kidney Failure</b>              | Polycystic kidney disease | 26 (5.3)             | 24 (4.4)               | 0.77        |
|                                             | Glomerulonephritis*       | 81 (16.6)            | 95 (17.2)              |             |
|                                             | Diabetic nephropathy      | 197 (40.3)           | 241 (43.7)             |             |
|                                             | Urological                | 35 (7.2)             | 39 (7.1)               |             |
|                                             | Unknown                   | 95 (19.4)            | 108 (19.6)             |             |
|                                             | Other                     | 55 (11.2)            | 44 (8.0)               |             |
| <b>Previous transplant</b>                  | Yes                       | 103 (21.1)           | 98 (17.8)              | 0.18        |
|                                             | No                        | 386 (78.9)           | 453 (82.2)             |             |
| <b>Immunosuppression at time of vaccine</b> | None                      | 405 (82.8)           | 463 (84.0)             | 0.60        |
|                                             | Yes                       | 84 (17.2)            | 88 (16.0)              |             |
| <b>Diabetes</b>                             | No                        | 239 (48.9)           | 251 (45.6)             | 0.28        |
|                                             | Yes                       | 250 (51.1)           | 300 (54.4)             |             |
| <b>Prior SARS-CoV2 infection</b>            | No                        | 263 (53.8)           | 291 (52.8)             | 0.75        |
|                                             | Yes                       | 226 (46.2)           | 260 (47.2)             |             |

**Table S3. Clinical characteristics associated with Omicron infection**

| Variable           | Reference Group      | Unadjusted       |         | Adjusted         |         |
|--------------------|----------------------|------------------|---------|------------------|---------|
|                    |                      | HR (95% CI)      | P value | HR (95% CI)      | P value |
| Age                | <65 years            | 1                |         |                  |         |
|                    | ≥65 years            | 0.63 (0.45-0.88) | 0.007   | 0.74 (0.52-1.03) | 0.075   |
| Ethnicity          | Black                | 1                |         | 1                |         |
|                    | Non-Black            | 0.54 (0.39-0.77) | 0.0004  | 0.63 (0.44-0.90) | 0.01    |
| Immunosuppression  | No                   | 1                |         |                  |         |
|                    | Yes                  | 0.94 (0.58-1.45) | 0.78    | -                |         |
| Number of vaccines | Unvaccinated         | 1                |         | 1                |         |
|                    | Partially vaccinated | 0.94 (0.54-1.72) | 0.83    | 1.03 (0.60-1.91) | 0.91    |
|                    | Boosted              | 0.42 (0.25-0.77) | 0.0024  | 0.50 (0.29-0.92) | 0.0179  |
| Prior infection    | No                   | 1                |         | 1                |         |
|                    | Yes                  | 0.69 (0.50-0.96) | 0.0289  | 0.63 (0.45-0.87) | 0.0059  |

**Table S4. Risk of SARS-CoV-2 infection by vaccination status and prior infection**

| <b>Variable</b>                     | <b>Reference Group</b>                 | <b>HR (95% CI)</b> | <b>P value</b> | <b>Vaccine Efficacy</b> |
|-------------------------------------|----------------------------------------|--------------------|----------------|-------------------------|
| <b>Vaccine type</b>                 | Unvaccinated                           | 1                  | -              |                         |
|                                     | Partially vaccinated-ChAdOx1           | 1.04 (0.57-1.97)   | 0.91           | -                       |
|                                     | Partially vaccinated -BNT162b2         | 0.83 (0.43-1.62)   | 0.57           | -                       |
|                                     | Boosted – ChAdOx1                      | 0.53 (0.30-0.98)   | 0.034          | 47 (2-70)               |
|                                     | Boosted – BNT162b2                     | 0.34 (0.19-0.64)   | 0.0005         | 66 (36-81)              |
| <b>Vaccine plus prior infection</b> | Unvaccinated                           | 1                  | -              |                         |
|                                     | Unvaccinated – prior infection         | 0.53 (0.18-1.47)   | 0.23           | -                       |
|                                     | Partially vaccinated                   | 0.81 (0.39-1.82)   | 0.58           | -                       |
|                                     | Partially vaccinated – prior infection | 0.62 (0.30-1.38)   | 0.20           | -                       |
|                                     | Boosted                                | 0.39 (0.20-0.86)   | 0.01           | 61 (14-80)              |
|                                     | Boosted – prior infection              | 0.23 (0.11-0.52)   | 0.0001         | 77 (48-89)              |

**Table S5. Treatments received by care setting**

In-hospital treatment was dependent on clinical characteristics and treatment algorithms as per UK National Institute of Health and Care Excellence guidelines<sup>S2</sup>

|                                               | Care Setting       |                       |
|-----------------------------------------------|--------------------|-----------------------|
|                                               | Outpatient (N=128) | Inpatient (N=17)*     |
| No directed therapy                           | 76 (59.4%)         | 5 (29.4) <sup>#</sup> |
| Sotrovimab                                    | 46 (35.9%)         | 2 (11.8)              |
| Molnupiravir                                  | 6 (4.7%)           |                       |
| Dexamethasone                                 |                    | 3 (17.6) <sup>#</sup> |
| Remdesivir                                    |                    | 1 (5.9)               |
| Dexamethasone plus Remdesivir                 |                    | 2 (11.8)              |
| Sotrovimab plus Remdesivir                    |                    | 2 (11.8) <sup>#</sup> |
| Dexamethasone plus Remdesivir plus Sotrovimab |                    | 2 (11.8) <sup>#</sup> |

\*Including patients with nosocomial infection; <sup>#</sup>Patients who died

**Table S6. Vaccine effectiveness against hospitalisation by vaccination status and prior infection**

| Variable                  | Reference Group      | HR (95% CI)      | P value | Vaccine Effectiveness |
|---------------------------|----------------------|------------------|---------|-----------------------|
| <b>Vaccination status</b> | Unvaccinated         | 1                | -       |                       |
|                           | Partially vaccinated | 0.23 (0.03-1.91) | -       |                       |
|                           | Boosted              | 0.40 (0.10-2.63) | -       |                       |
| <b>Prior infection</b>    | No                   | 1                | -       | 73 (11-94)            |
|                           | Yes                  | 0.27 (0.06-0.89) | 0.049   |                       |



## Supplementary References

- S1. Clarke CL, Predecki M, Dhutia A, et al. Longevity of SARS-CoV-2 immune responses in hemodialysis patients and protection against reinfection. *Kidney international* 2021; **99**(6): 1470-7.
- S2. COVID-19 rapid guideline: managing COVID-19. <https://www.nice.org.uk/guidance/ng191>.
